# Supplementary material for: SLC27A2 mediates FAO in colorectal cancer through nongenic crosstalk regulation of the PPARs pathway
Source: BMC Cancer. 2023 Apr 11;23:335. doi: 10.1186/s12885-023-10816-3 (PMC10091540; doi:10.1186/s12885-023-10816-3)
Supplement: Supplementary file 3 — Additional file 3: Supplementary Table 1. primers. [file 12885_2023_10816_MOESM3_ESM.xlsx]

## Sheet: Sheet1
Supplementary Table1 primers
Primers of Genes	5' to 3'
human-SLC27A2 Forward	TTTCCGCCATCTACACAGTCC
human-SLC27A2 Reverse	CGTAGGTGAGAGTCTCGTCG
human-CPT1A Forward	TCCAGTTGGCTTATCGTGGTG
human-CPT1A Reverse	TCCAGAGTCCGATTGATTTTTGC
human-CPT2 Forward	CTGGAGCCAGAAGTGTTCCAC
human-CPT2 Reverse	AGGCACAAAGCGTATGAGTCT
human-SLC35G1 Forward	TGTCCTGGACTTGGCTTGTTT
human-SLC35G1 Reverse	GCATTTGGAACACACATCGAAA
human-SLC25A20 Forward	GACCAGCCAAAACCCATCAG
human-SLC25A20 Reverse	AGAGGGTGACCGACGAACA
human-ACOX1 Forward	ACTCGCAGCCAGCGTTATG
human-ACOX1 Reverse	AGGGTCAGCGATGCCAAAC
human-EHHADH Forward	AAACTCAGACCCGGTTGAAGA
human-EHHADH Reverse	TTGCAGAGTCTACGGGATTCT
human-ABCG2 Forward	ACGAACGGATTAACAGGGTCA
human-ABCG2 Reverse	CTCCAGACACACCACGGAT
human-ABCD3 Forward	GCTGGTGTCTCGAACATATTGT
human-ABCD3 Reverse	ATCTTTCCTGCTACGACCAATG
human-HADHA Forward	CTGCCCAAAATGGTGGGTGT
human-HADHA Reverse	GGAGGTTTTAGTCCTGGTCCC
human-HADHB Forward	CTGTCCAGACCAAAACGAAGAA
human-HADHB Reverse	CGATGCAACAAACCCGTAAGC
human-HADH Forward	CACACAGTAGTGTTGGTAGACC
human-HADH Reverse	TGCCACTTTCCTAAGGCTTTC
human-MCPT2 Forward	TGTTGGTCACACTTACACCCT
human-MCPT2 Reverse	TGCTTTCTTTCGCTGAGGTCT
human-ETFA Forward	CAGAGGAACTGACACCATTGATT
human-ETFA Reverse	AGGTTCTTTCCGAAGGCAGAT
human-EPHX2 Forward	GTGCTCCGAGACCGCTAAAG
human-EPHX2 Reverse	GCTGAAATCGCCTTGTCAAAGAT
human-beta actin Forward	CATGTACGTTGCTATCCAGGC
human-beta actin Reverse	CTCCTTAATGTCACGCACGAT
